# Supplementary material for: Direct synthesis of formic acid from carbon dioxide by hydrogenation in acidic media
Source: PubMed Central journal article supplement — Nat Commun. 2014 Jun 2;5:4017. doi: 10.1038/ncomms5017 (PMC4059918; doi:10.1038/ncomms5017), 2014-06-02
Supplement: ncomms5017-s1.pdf [file ncomms5017-s1.pdf]

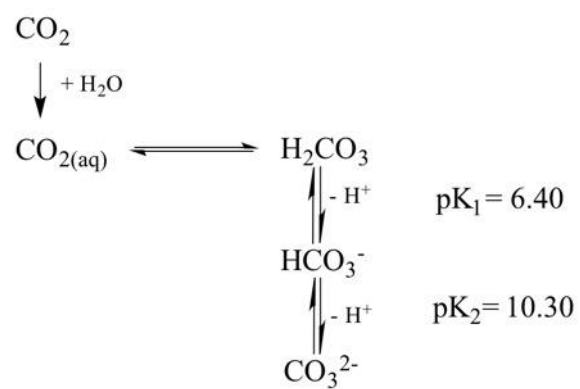

Supplementary Figure 1. Protonation equilibria of the CO<sub>2</sub> in water.

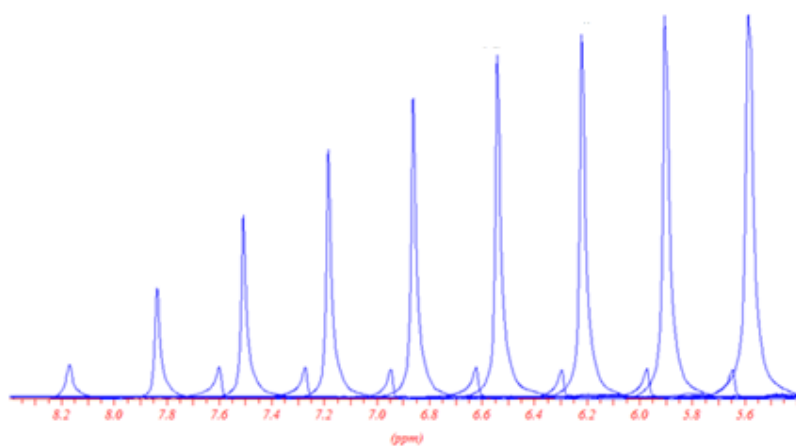

**Supplementary Figure 2. Hydrogenation of CO<sub>2</sub> with [RuCl<sub>2</sub>(PTA)<sub>4</sub>].** <sup>1</sup>H NMR signal of HCOOH as a function of time in the hydrogenation of carbon dioxide to formic acid. [RuCl<sub>2</sub>(PTA)<sub>4</sub>] (2.76 mM) was dissolved in H<sub>2</sub>O (2 mL) under N<sub>2</sub> atmosphere in a medium pressure sapphire NMR tube. This solution was pressurized at room temperature to 50 bar with CO<sub>2</sub> and completed to 100 bar with H<sub>2</sub>. The system was heated to 60°C and the reaction was followed by <sup>13</sup>C NMR (100 MHz) spectroscopy. Figure 2 shows the evolution of the <sup>1</sup>H NMR signal in aqueous solution (H<sub>2</sub>O) of HCOOH at 8.16 ppm (time difference between spectra Δt = 143 min). Reaction time: 148h.

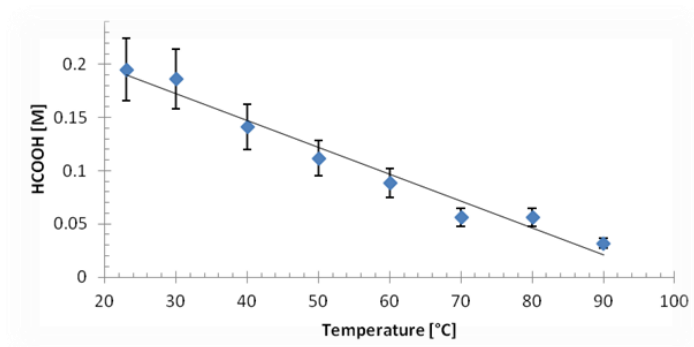

**Supplementary Figure 3. Effect of temperature on the catalytic hydrogenation of CO<sub>2</sub> with [RuCl<sub>2</sub>(PTA)<sub>4</sub>] in water.**

Reaction conditions: [RuCl<sub>2</sub>(PTA)<sub>4</sub>] (2.76 mM), P(total) = 100 bar, P(H<sub>2</sub>)/P(CO<sub>2</sub>) ratio of 1, in aqueous solution (2 mL) ([DSS] = 0.0130 M), average values of several (2-6) measurements with a reproducibility is ± 15 %. The trend line is shown as a guide and is not a mathematical fit of the data. The formic acid syntheses were followed for 6 to 570 h, depending on the temperature.

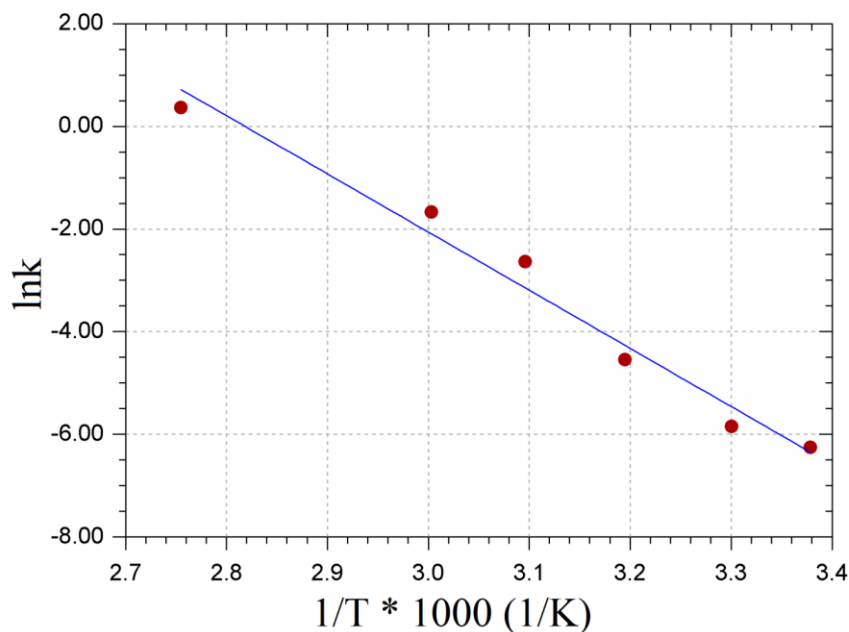

**Supplementary Figure 4. Arrhenius plot of the temperature dependence of the reaction.** Determination of the plot using the pseudo first order rate constants ( $k$ ) obtained from the kinetics curves (from Figure 2,  $t/^\circ\text{C}$ : 23, 30, 40, 50, 60 and 90; with  $k/h^{-1}$  values: 0.00192, 0.00289, 0.0106, 0.0717, 0.188 and 1.44, respectively). Reaction conditions:  $[\text{RuCl}_2(\text{PTA})_4]$  (2.76 mM),  $P(\text{total}) = 100$  bar,  $P(\text{H}_2)/P(\text{CO}_2)$  ratio of 1, reaction time 6 - 570 h depending on the temperature, in aqueous solution (2 mL). From the Arrhenius plot of the temperature dependence of the rate constants (Figure 4), the activation enthalpy was determined, giving a value of + 95.5 kJ/mol, which is somewhat higher than the data of + 86 kJ/mol obtained for the same catalytic system at neutral pH.<sup>27</sup> In other catalytic systems known for the hydrogenation of the  $\text{HCO}_3^-$  salts, the activation enthalpy values are much smaller, for example +36 kJ/mol with  $[\text{RhCl}(\text{TPPMS})_3]$  catalyst,<sup>32, 54</sup> with  $[\text{RhCl}(\text{TPPTS})_3]$ <sup>55</sup> it is 25 kJ/mol, with  $\text{K}[\text{RuCl}(\text{edta-H})]$ <sup>56</sup> it is +31 kJ/mol, or in the hydrogenation of bicarbonate with a heterogeneous Pd catalyst<sup>57, 58</sup> it is +39 kJ/mol. In all these cases it is important to note that the addition of either an amine, an alcohol or a base is necessary for the reaction to proceed.

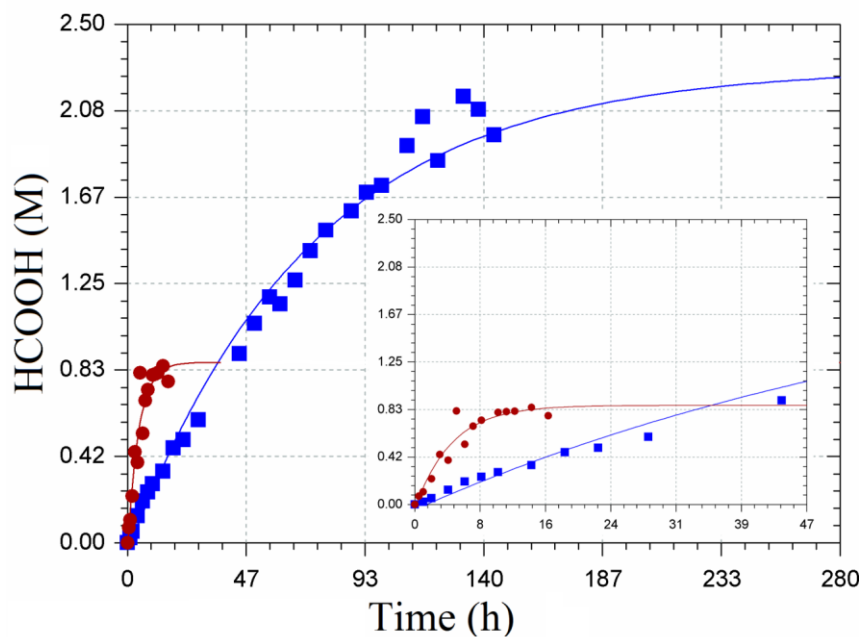

**Supplementary Figure 5. Temperature effect on the rate and equilibrium of the catalytic hydrogenation of CO<sub>2</sub> with [RuCl<sub>2</sub>(PTA)<sub>4</sub>] in DMSO.** 50°C (blue square); 90°C (brown circle). Reaction conditions: [RuCl<sub>2</sub>(PTA)<sub>4</sub>] (2.76 mM), P(total) = 100 bar, P(H<sub>2</sub>)/P(CO<sub>2</sub>) = 1, DMSO (2 mL), average values of several (2-6) measurements, reproducibility is ± 15 %. The reaction times were 16 h at 90°C and 150 h at 50°C.

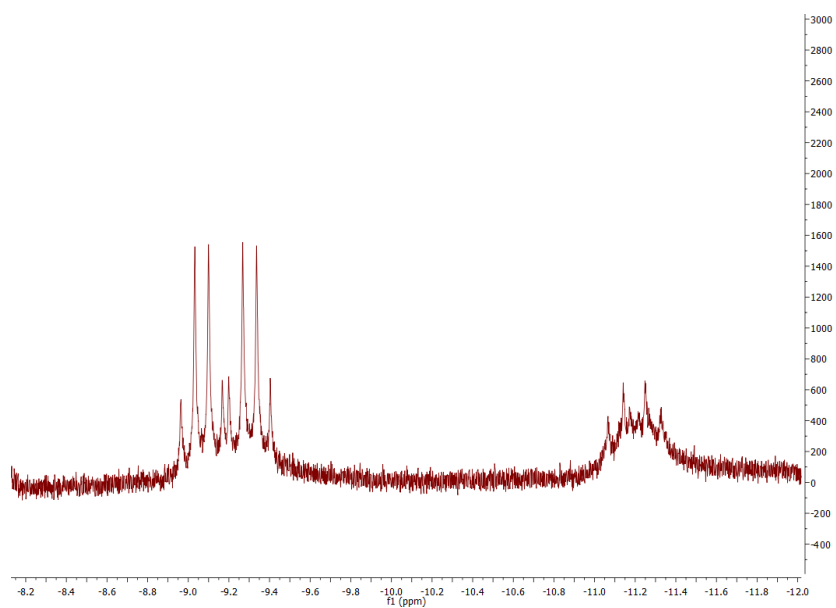

**Supplementary Figure 6.**  $^1\text{H}$  NMR spectra showing the hydride region during the mechanistic study of the carbon dioxide hydrogenation with  $[\text{RuCl}_2(\text{PTA})_4]$  in DMSO. The multiplet centered at -9.2 ppm corresponds to  $[\text{RuH}(\text{PTA})_4\text{Cl}]$  and the multiplet centered at -11.2 ppm corresponds to  $[\text{RuH}_2(\text{PTA})_4]$ . Reaction conditions:  $[\text{RuCl}_2(\text{PTA})_4]$  (2.76 mM),  $P(\text{total}) = 100$  bar,  $P(\text{H}_2)/P(\text{CO}_2)$  ratio of 1,  $t = 50^\circ\text{C}$ , DMSO (2 mL containing DSS, 0.0130 M).

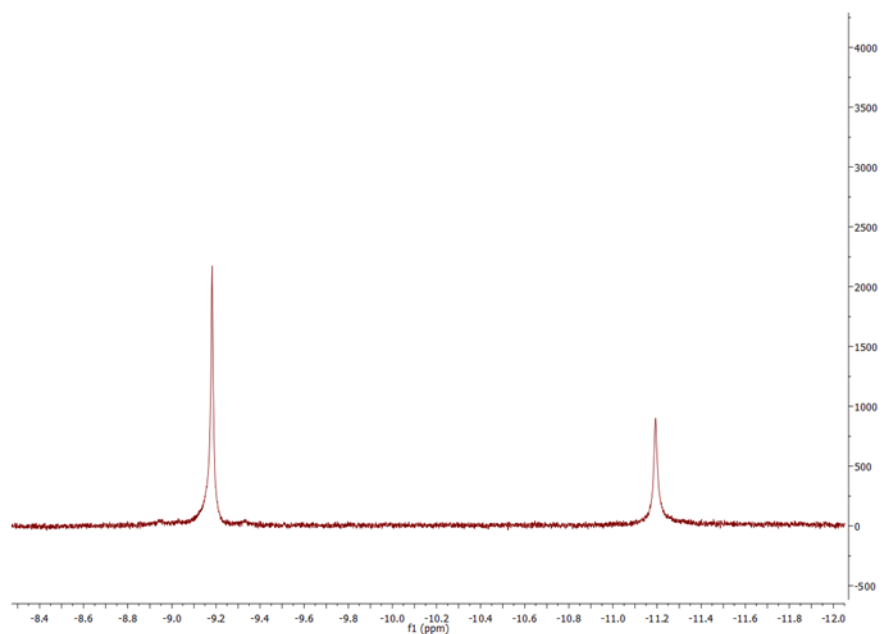

**Supplementary Figure 7.**  $^1\text{H}\{^{31}\text{P}\}$  NMR spectra showing the hydride region during the mechanistic study of the carbon dioxide hydrogenation with  $[\text{RuCl}_2(\text{PTA})_4]$  in DMSO. The singlet at  $-9.2$  ppm correspond to  $[\text{RuH}(\text{PTA})_4\text{Cl}]$  and the singlet at  $-11.2$  ppm to  $[\text{RuH}_2(\text{PTA})_4]$ . Reaction conditions:  $2.76$  mM  $[\text{RuCl}_2(\text{PTA})_4]$ ,  $P(\text{total}) = 100$  bar,  $P(\text{H}_2)/P(\text{CO}_2)$  ratio of 1,  $t = 50^\circ\text{C}$ , reaction volume of  $2$  mL (DSS solution of  $0.0130$  M in DMSO).

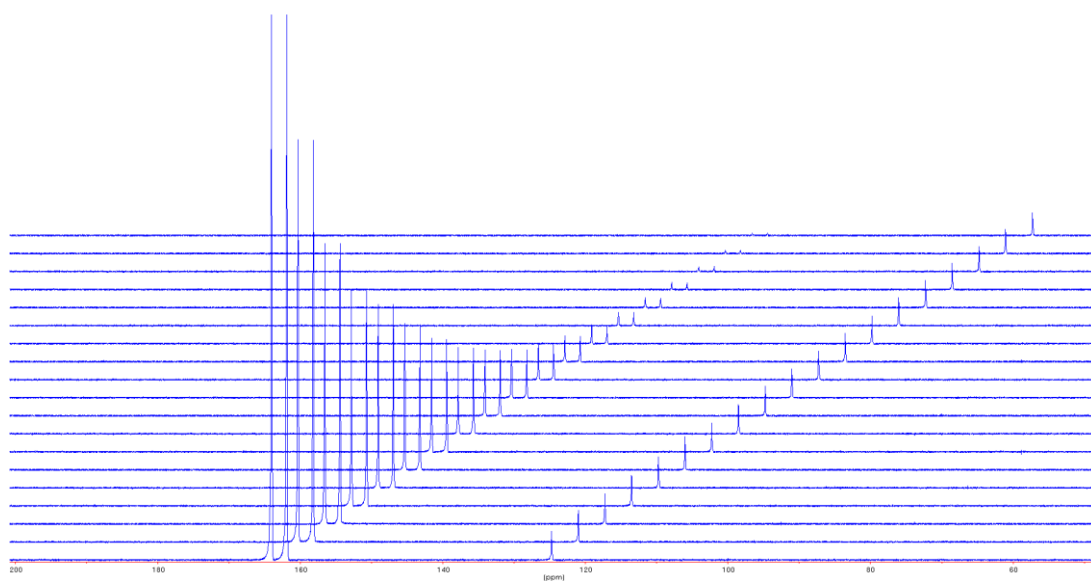

**Supplementary Figure 8. Hydrogen production from HCOOH in DMSO.** <sup>13</sup>C NMR signals of HCOOH in the formic acid dehydrogenation reaction into carbon dioxide and hydrogen in d<sup>6</sup>-DMSO. [RuCl<sub>2</sub>(PTA)<sub>4</sub>] (10.2 mM) was dissolved in d<sup>6</sup>-DMSO (2 mL) in a 10 mm NMR tube. The system was heated to 80°C and the reaction was followed by <sup>13</sup>C NMR (100 MHz) spectroscopy. Figure 8 shows the evolution of the <sup>13</sup>C NMR doublet of HCOOH at 163 ppm and signal corresponding to the dissolved CO<sub>2</sub> at 124.7 ppm (time difference between spectra Δt = 1h). Reaction time: 20 h.



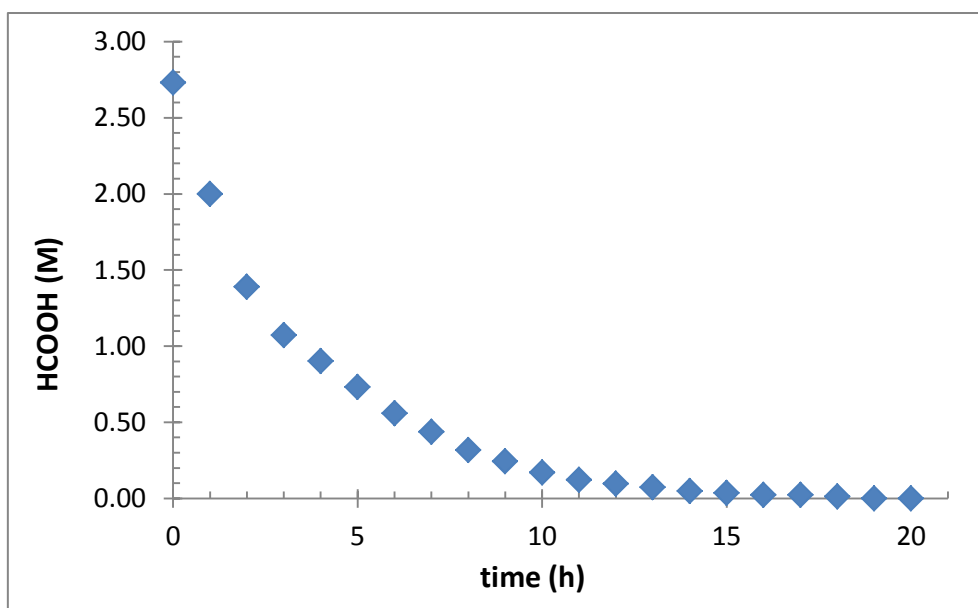

**Supplementary Figure 9. Hydrogen production from HCOOH in DMSO.** Decrease of the formic acid concentration in the dehydrogenation of formic acid into carbon dioxide and hydrogen in  $d^6$ -DMSO as function of time. The [HCOOH] was determined *in situ* by quantitative  $^{13}\text{C}$  NMR spectroscopy.<sup>51</sup>  $[\text{RuCl}_2(\text{PTA})_4]$  (10.2 mM) was dissolved in  $d^6$ -DMSO (2 mL) in a 10 mm NMR tube. The system was heated to 80°C and the reaction was followed by  $^{13}\text{C}$  NMR (100 MHz) spectroscopy.

**Supplementary Table 1. Selective carbon dioxide hydrogenation into formic acid in water with different Ru(II) and Rh(I) catalysts.**

| Entry | Catalyst precursor                                                                      | P <sub>total</sub><br>[bar] | HCOOH <sup>[a]</sup><br>[M] | TON <sup>[b]</sup> |
|-------|-----------------------------------------------------------------------------------------|-----------------------------|-----------------------------|--------------------|
| 1     | [RuCl <sub>2</sub> (PTA) <sub>4</sub> ]                                                 | 60                          | 0.023                       | 8                  |
| 2     | [RuCl <sub>2</sub> (PTA) <sub>4</sub> ]                                                 | 100                         | 0.083                       | 30                 |
| 3     | [RhCl(PTA) <sub>3</sub> ]                                                               | 60                          | 0.002                       | 0.7                |
| 4     | [RhCl(TPPMS) <sub>3</sub> ]                                                             | 60                          | 0.001                       | 0.4                |
| 5     | [RuCl <sub>2</sub> (PTA)([9]aneS <sub>3</sub> )]                                        | 100                         | 0.046                       | 17                 |
| 6     | [Ru(H <sub>2</sub> O) <sub>4</sub> (MePTA) <sub>2</sub> ](tos) <sub>4</sub>             | 60                          | 0.020                       | 7                  |
| 7     | [RuCl <sub>2</sub> (TPPMS) <sub>2</sub> ]                                               | 60                          | 0.011                       | 4                  |
| 8     | [RuCl <sub>2</sub> (TPPTS) <sub>2</sub> ] <sub>2</sub>                                  | 60                          | 0.012                       | 4                  |
| 9     | [RuCl <sub>2</sub> ( <i>p</i> -cymene) <sub>2</sub> ]                                   | 60                          | 0.012                       | 4                  |
| 10    | [RuCl <sub>2</sub> ( <i>p</i> -cymene) <sub>2</sub> ] + 2 eq. TPPMS                     | 60                          | 0.021                       | 8                  |
| 11    | [RuCl <sub>2</sub> ( <i>p</i> -cymene) <sub>2</sub> ] + 2 eq. TPPTS                     | 60                          | 0.011                       | 4                  |
| 12    | [RuCl( <i>p</i> -cymene)(1-methyl-3-(prop-2-enyl)-1H-imidazol-3-ium)][BF <sub>4</sub> ] | 100                         | 0.042                       | 15                 |

The catalyst (c = 2.76 mM) was dissolved in H<sub>2</sub>O (2 mL) under a N<sub>2</sub> atmosphere in a medium pressure sapphire NMR tube. The solution was pressurized at room temperature with CO<sub>2</sub> and completed by H<sub>2</sub> to the required pressure with a P(H<sub>2</sub>)/P(CO<sub>2</sub>) ratio of 1. Then the system was heated to 60°C and shaken until the equilibrium of the reaction was reached (72 – 96 h). The final yield of HCOOH was determined by <sup>1</sup>H NMR spectroscopy with the DSS as an internal standard. <sup>[a]</sup>average values of several (4-5) measurements with a reproducibility of ± 15%. <sup>[b]</sup>Turnover number (TON), the number of moles of CO<sub>2</sub> (or H<sub>2</sub>) that one mole of catalyst converts into HCOOH.

**Supplementary Table 2. Direct synthesis of formic acid from H<sub>2</sub> and CO<sub>2</sub> with [RuCl<sub>2</sub>(PTA)<sub>4</sub>] catalyst as function of temperature.**

| Entry             | Temperature<br>[°C] | P(H <sub>2</sub> )/P(CO <sub>2</sub> )<br>[bar] | HCOOH<br>[M] | TON |
|-------------------|---------------------|-------------------------------------------------|--------------|-----|
| 1                 | 23                  | 50/50                                           | 0.195        | 71  |
| 2                 | 30                  | 50/50                                           | 0.186        | 67  |
| 3                 | 40                  | 50/50                                           | 0.141        | 51  |
| 4                 | 50                  | 50/50                                           | 0.112        | 41  |
| 5                 | 60                  | 50/50                                           | 0.088        | 32  |
| 6                 | 60                  | 50/50                                           | 0.083        | 30  |
| 7                 | 70                  | 50/50                                           | 0.056        | 20  |
| 8                 | 80                  | 50/50                                           | 0.056        | 20  |
| 9                 | 90                  | 50/50                                           | 0.032        | 12  |
| 10 <sup>[a]</sup> | 135                 | 70/50                                           | 0.024        | 40  |

Reaction conditions: [RuCl<sub>2</sub>(PTA)<sub>4</sub>] (2.76 mM), P(total) = 100 bar, P(H<sub>2</sub>)/P(CO<sub>2</sub>) ratio of 1, aqueous solution (2 mL) ([DSS] = 0.0130 M), average values of several (2-6) measurements, reproducibility is ± 15 %, [a] 135°C, 10 minutes, 0.597 mM [RuCl<sub>2</sub>(PTA)<sub>4</sub>]. The formic acid syntheses were followed for 6 h to 570 h, depending on the temperature.

**Supplementary Table 3. Recycling experiments: carbon dioxide hydrogenation with [RuCl<sub>2</sub>(PTA)<sub>4</sub>] in water.**

| Cycle | HCOOH<br>[M] | TON |
|-------|--------------|-----|
| 1     | 0.151        | 15  |
| 2     | 0.120        | 27  |
| 3     | 0.131        | 40  |
| 4     | 0.174        | 58  |
| 5     | 0.142        | 72  |

Reaction conditions: [RuCl<sub>2</sub>(PTA)<sub>4</sub>] (10 mM), P(total) = 100 bar, P(H<sub>2</sub>)/P(CO<sub>2</sub>) ratio of 1, t = 60°C, water (2 mL, containing [DSS] = 0.0130 M), average values of several (2-3) measurements for each cycle, reproducibility is ± 15 %. The HCOOH concentrations were determined after 62 h reaction time.

**Supplementary Table 4. Catalytic hydrogenation of carbon dioxide to formic acid in organic solvents.**

| Entry | Solvent             | HCOOH<br>[M]        | TON |
|-------|---------------------|---------------------|-----|
| 1     | H <sub>2</sub> O    | 0.10                | 36  |
| 2     | DMSO                | 1.8                 | 652 |
| 3     | Ethanol             | 0.20                | 72  |
| 4     | Methanol            | 0.20                | 72  |
| 5     | Acetonitrile        | 0.20 <sup>[a]</sup> | 72  |
| 6     | Propylene carbonate | 0.20 <sup>[a]</sup> | 72  |
| 7     | Toluene             | -                   | -   |

Reaction conditions: 2.76 mM [RuCl<sub>2</sub>(PTA)<sub>4</sub>], P(total) = 100 bar, P(H<sub>2</sub>)/P(CO<sub>2</sub>) ratio of 1, t = 50°C, reaction time 120 h, reaction volume of 2 mL (DSS solution of 0.0130 M), average values of several (2-3) measurements, reproducibility is ± 15 %. <sup>[a]</sup>determined by the standard addition method.

**Supplementary Table 5. Selective hydrogenation of carbon dioxide into formic acid in DMSO.**

| Entry | Catalyst precursor                      | Total pressure<br>[bar] | HCOOH<br>[M] | TON |
|-------|-----------------------------------------|-------------------------|--------------|-----|
| 1     | [RuCl <sub>2</sub> (PTA) <sub>4</sub> ] | 100                     | 1.93         | 699 |
| 2     | [RhCl(PTA) <sub>3</sub> ]               | 100                     | 0.011        | 4   |
| 3     | IrCl <sub>3</sub> + 10 eq. PTA          | 100                     | 0.003        | 1   |

Reaction conditions: catalyst (2.76 mM), P(total) = 100 bar, P(H<sub>2</sub>)/P(CO<sub>2</sub>) ratio of 1, t = 50°C, DMSO (2 mL) (DSS solution of 0.0130 M), average values of several (2-3) measurements, reproducibility is ± 15 %. Reaction time: 120 h.

**Supplementary Table 6. Production of formic acid as a function of pressure and of P(H<sub>2</sub>)/P(CO<sub>2</sub>) pressure ratio.**

| Entry | Total pressure<br>[bar] | P(H <sub>2</sub> ) / P(CO <sub>2</sub> )<br>ratio | HCOOH<br>[M] | TON |
|-------|-------------------------|---------------------------------------------------|--------------|-----|
| 1     | 50                      | 1                                                 | 0.39         | 141 |
| 2     | 60                      | 1                                                 | 0.53         | 192 |
| 3     | 70                      | 1                                                 | 0.95         | 344 |
| 4     | 80                      | 1                                                 | 1.19         | 431 |
| 5     | 90                      | 1                                                 | 1.22         | 442 |
| 6     | 100                     | 1                                                 | 1.93         | 699 |
| 7     | 100                     | 1.5                                               | 1.39         | 504 |
| 8     | 100                     | 2.3                                               | 1.29         | 467 |
| 9     | 100                     | 4                                                 | 1.56         | 565 |
| 10    | 100                     | 9                                                 | 0.95         | 344 |

Reaction conditions: [RuCl<sub>2</sub>(PTA)<sub>4</sub>] (2.76 mM), t = 50°C, reaction time 120 h, in DMSO solvent (2 mL), average values of several (2-6) measurements, reproducibility is ± 15.

**Supplementary Table 7. Production of formic acid as a function of temperature.**

| Entry | Temperature<br>[°C] | HCOOH<br>[M] | TON |
|-------|---------------------|--------------|-----|
| 1     | 40                  | 1.87         | 678 |
| 2     | 50                  | 1.93         | 699 |
| 3     | 60                  | 1.84         | 667 |
| 4     | 70                  | 1.12         | 406 |
| 5     | 80                  | 0.99         | 359 |
| 6     | 84                  | 0.90         | 326 |
| 7     | 90                  | 0.83         | 300 |

Reaction conditions:  $[\text{RuCl}_2(\text{PTA})_4]$  (2.76 mM),  $P(\text{total}) = 100$  bar,  $P(\text{H}_2)/P(\text{CO}_2) = 1$ , reaction time between 10 to 150 h,

DMSO (2 mL), average values of several (2-6) measurements, reproducibility is  $\pm 15$  %.



## Supplementary References

- <sup>54</sup> Katho, A., Opre, Z., Laurenczy, G. & Joo, F. Water-soluble analogs of  $[\text{RuCl}_3(\text{NO})(\text{PPh}_3)_2]$  and their catalytic activity in the hydrogenation of carbon dioxide and bicarbonate in aqueous solution. *J. Mol. Catal. a-Chem.* **204**, 143-148 (2003).
- <sup>55</sup> Gassner, F. & Leitner W.  $\text{CO}_2$ -activation 3. Hydrogenation of carbon-dioxide to formic-acid using water-soluble rhodium catalysts. *J. Chem. Soc., Chem. Comm.* 1465-1466 (1993).
- <sup>56</sup> Khan, M. M. T., Halligudi, S. B. & Shukla, S. Reduction of  $\text{CO}_2$  by molecular hydrogen to formic acid and formaldehyde and their decomposition to CO and  $\text{H}_2\text{O}$ . *J. Mol. Catal.* **57**, 47-60 (1989).
- <sup>57</sup> Wiener, H., Blum, J., Feilchenfeld, H., Sasson, Y. & Zalmanov, N. The heterogeneous catalytic hydrogenation of bicarbonate to formate in aqueous solutions. *J. Catal.* **110**, 184-190 (1988).
- <sup>58</sup> Stalder, C. J., Chao, S., Summers, D. P. & Wrighton, M. S. Supported palladium catalysts for the reduction of sodium bicarbonate to sodium formate in aqueous solution at room temperature and one atmosphere of hydrogen. *J. Am. Chem. Soc.* **105**, 6318-6320 (1983).
